# Supplementary material for: The association of very low-density lipoprotein receptor (VLDLR) haplotypes with egg production indicates VLDLR is a candidate gene for modulating egg production
Source: PubMed Central journal article supplement (PMC5004830; doi:10.1590/1678-4685-gmb-2015-0206), 2016-07-14
Supplement: 1415-4757-gmb-1678-4685-GMB-2015-0206-Suppl01.pdf [file 1415-4757-gmb-1678-4685-GMB-2015-0206-Suppl01.pdf]

**Table S1** - Primer sets used for PCR and DNA sequencing of the VLDLR gene.

| Primer ID | Primer sequence (5'-3') | Product size (bp) |
|-----------|-------------------------|-------------------|
| V_1F      | CTGTCCCACAATGCTCTA      | 1420              |
| V_1R      | AGTGACCCTGGTAAATGG      |                   |
| V_3F      | TGCCGATGTAGATGTGGT      | 1354              |
| V_3R      | TCCTTCTGTTAGCCTGTGA     |                   |
| V_4F      | AAAGCCTGGATAAGAGCG      | 771               |
| V_4R      | CTACTGCAATGGTGGTGC      |                   |
| V_5F      | GCGGTGGTATGCTGTAGG      | 1572              |
| V_5R      | AGGCAAGAAGGCAAATGG      |                   |
| V_6F      | TGCTGAACTGTGCCGTAA      | 881               |
| V_6R      | AGCCACCATTTCATCCCT      |                   |
| V_7F      | GTCCTGGAAATGTGATGG      | 1040              |
| V_7R      | GGTAGCCAGATGGTCAGC      |                   |
| V_8F      | CATCTGGCTACCAATACC      | 912               |
| V_8R      | GCAGTCCCATCTTCACA       |                   |
| V_9F      | TAACTTGGTCCTTCTTCTA     | 993               |
| V_9R      | CTTATTTGATACTTGCCTC     |                   |
| V_10F     | GCCAAATCTGTATCAACC      | 1007              |
| V_10R     | ACGGGTATCAATAGAGGC      |                   |
| V_11F     | ACCCGTGATAAAGTTGGA      | 827               |
| V_11R     | AAGACTGGCAGAGTTTCC      |                   |

---

|       |                      |      |
|-------|----------------------|------|
| V_12F | AAGTGGTAACCTTCCCTG   |      |
| V_12R | TTGCCTCTTACAAGTTTAGT | 1142 |
| V_13F | AGAGGCAAACATGACAGT   |      |
| V_13R | TAAGACATTAAGCCCACA   | 1278 |
| V_14F | TGCCAAGAGTGCTCAAAG   |      |
| V_14R | TCCAAGAATGGAGGAAGT   | 1129 |
| V_15F | AGTGAAGACTTGCGTTGT   |      |
| V_15R | CTGCTTTGATACCCATCT   | 1037 |

---
