# Supplementary material for: The association of very low-density lipoprotein receptor (VLDLR) haplotypes with egg production indicates VLDLR is a candidate gene for modulating egg production
Source: PubMed Central journal article supplement (PMC5004830; doi:10.1590/1678-4685-gmb-2015-0206), 2016-07-14
Supplement: 1415-4757-gmb-1678-4685-GMB-2015-0206-Suppl02.pdf [file 1415-4757-gmb-1678-4685-GMB-2015-0206-Suppl02.pdf]

**Table S2** - Information for all SNPs found in the VLDLR gene.

| SNP ID                  | Description <sup>a</sup> | Position in VLDLR gene | dbSNP accession no. |
|-------------------------|--------------------------|------------------------|---------------------|
| SNP3                    | g.26417373 T>C           | intron1                | rs16775985          |
| SNP4                    | g.26417380 C>T           | intron1                | rs16775986          |
| SNP5                    | g.26417409 G>T           | intron1                | new                 |
| SNP6                    | g.26417609 C>G           | intron1                | new                 |
| <b>SNP8<sup>b</sup></b> | <b>g.26419086 G&gt;A</b> | <b>intron1</b>         | <b>rs312633123</b>  |
| <b>SNP9</b>             | <b>g.26420908T&gt;G</b>  | <b>intron2</b>         | <b>new</b>          |
| SNP13                   | g.26422763T>C            | intron4                | new                 |
| <b>SNP14</b>            | <b>g.26423124A&gt;G</b>  | <b>intron4</b>         | <b>new</b>          |
| <b>SNP19</b>            | <b>g.26424657G&gt;A</b>  | <b>exon6,synonymy</b>  | <b>rs317219970</b>  |
| SNP20                   | g.26424907T>C            | intron7                | rs312397794         |
| SNP21                   | g.26425237G>A            | intron7                | new                 |
| SNP24                   | g.26425727A>G            | intron9                | rs14777628          |
| SNP25                   | g.26425926T>A            | intron9                | new                 |
| SNP26                   | g.26426241T>C            | intron10               | rs314956051         |
| SNP27                   | g.26426244G>A            | intron10               | rs317006300         |
| SNP28                   | g.26426267T>C            | intron10               | rs317616384         |
| SNP29                   | g.26426272C>T            | intron10               | rs315755231         |
| SNP30                   | g.26426369C>T            | intron10               | rs316405899         |
| SNP31                   | g.26426376C>T            | intron10               | rs315181270         |
| <b>SNP32</b>            | <b>g.26426398T&gt;C</b>  | <b>intron10</b>        | <b>rs317314828</b>  |
| SNP35                   | g.26426760CT>AG          | intron11               | new                 |
| SNP36                   | g.26426908T>C            | intron11               | rs316956892         |
| SNP39                   | g.26427704C>T            | exon14, synonymy       | rs317592904         |

|              |                         |                           |                    |
|--------------|-------------------------|---------------------------|--------------------|
| <b>SNP41</b> | <b>g.26427922A&gt;G</b> | <b>intron14</b>           | <b>rs314567990</b> |
| <b>SNP46</b> | <b>g.26429604A&gt;C</b> | <b>intron15</b>           | <b>rs14777635</b>  |
| SNP48        | g.26429706A>C           | exon16, synomymy          | rs14777636         |
| SNP49        | g.26430448G>A           | intron17                  | rs14777642         |
| SNP52        | g.26431178G>A           | 3' flanking region        | rs318038559        |
| <b>SNP53</b> | <b>g.26431186C&gt;T</b> | <b>3' flanking region</b> | <b>rs314284862</b> |
| SNP54        | g.26431361G>A           | 3' flanking region        | new                |

<sup>a</sup>Genomic positions of SNPs are based on the chicken genome galGal4 assembly (<http://genome.ucsc.edu>).

<sup>b</sup>SNPs shown in bold letters were used in the haplotype association study.
